# Supplementary material for: Identification of Nectin-4 Oncoprotein as a Diagnostic and Therapeutic Target for Lung Cancer
Source: Oxford University Press journal article supplement (doi:10.1158/0008-5472.can-09-0016), 2009-08-12
Supplement: 00085472can090016-sup-stabs_1-2.pdf [file 00085472can090016-sup-stabs_1-2.pdf]

Supplementary Table 1A.

Sensitivity and specificity of serum Nectin-4, CEA, and CYFRA 21-1 in detecting NSCLCs

|                           | total | lung cancer patients<br>n = 164 | normal volunteers<br>n = 131 |
|---------------------------|-------|---------------------------------|------------------------------|
| <b>Nectin-4</b>           |       |                                 |                              |
| serum Nectin-4 positive   | 91    | 88                              | 3                            |
| serum Nectin-4 negative   | 204   | 76                              | 128                          |
|                           |       | sensitivity 53.7%               | specificity 97.7%            |
| <b>CEA</b>                |       |                                 |                              |
| serum CEA positive        | 73    | 70                              | 3                            |
| serum CEA negative        | 222   | 94                              | 128                          |
|                           |       | sensitivity 42.7%               | specificity 97.7%            |
| <b>CYFRA 21-1</b>         |       |                                 |                              |
| serum CYFRA 21-1 positive | 69    | 64                              | 5                            |
| serum CYFRA 21-1 negative | 226   | 100                             | 126                          |
|                           |       | sensitivity 39.0%               | specificity 96.2%            |

Supplementary Table 1B.

Association between serum Nectin-4-positivity and normal volunteers' characteristics (n = 131)

|                    | Total<br>n = 131 | Serum Nectin-4 positive<br>n = 3 | Serum Nectin-4 absent<br>n = 128 | P-value: positive vs absent |
|--------------------|------------------|----------------------------------|----------------------------------|-----------------------------|
| <b>Gender</b>      |                  |                                  |                                  |                             |
| Male               | 88               | 2                                | 86                               | >0.9999**                   |
| Female             | 43               | 1                                | 42                               |                             |
| <b>Age (years)</b> |                  |                                  |                                  |                             |
| < 65               | 116              | 2                                | 114                              | 0.3078**                    |
| ≥ 65               | 15               | 1                                | 14                               |                             |
| <b>Smoking</b>     |                  |                                  |                                  |                             |
| pack-years (±1SD)  | 16.4 ± 20.8      | 21.7 ± 33.3                      | 16.3 ± 20.6                      | 0.6589*                     |
| current smoker     | 36               | 1                                | 35                               | 0.6004**, **                |
| former smoker      | 27               | 1                                | 26                               |                             |
| never smoker       | 68               | 1                                | 67                               |                             |

\*\*Fisher's exact test

\*Mann-Whitney *U* test

\*\*current & former vs never

Supplementary Table 1C.

Association between serum Nectin-4-positivity and COPD patients' characteristics (n=86)

|                                                   | Total<br>n = 86    | Serum Nectin-4<br>positive<br>n = 7 | Serum Nectin-4<br>absent<br>n = 79 | P-value:<br>positive vs<br>absent |
|---------------------------------------------------|--------------------|-------------------------------------|------------------------------------|-----------------------------------|
| <b>Gender</b>                                     |                    |                                     |                                    |                                   |
| Male                                              | 76                 | 7                                   | 69                                 | >0.9999**                         |
| Female                                            | 10                 | 0                                   | 10                                 |                                   |
| <b>Age (years)</b>                                |                    |                                     |                                    |                                   |
| < 65                                              | 27                 | 2                                   | 25                                 | >0.9999**                         |
| >= 65                                             | 59                 | 5                                   | 54                                 |                                   |
| <b>Smoking</b>                                    |                    |                                     |                                    |                                   |
| pack-years ( $\pm$ 1SD)                           | 66.7 $\pm$ 44.4    | 69.3 $\pm$ 60.0                     | 66.5 $\pm$ 43.2                    | 0.8572 <sup>+</sup>               |
| current smoker                                    | 16                 | 1                                   | 15                                 | >0.9999**                         |
| former smoker                                     | 70                 | 6                                   | 64                                 |                                   |
| <b>Respiratory function (<math>\pm</math>1SD)</b> |                    |                                     |                                    |                                   |
| FEV 1.0 (l)                                       | 1409.4 $\pm$ 576.7 | 1486.7 $\pm$ 597.2                  | 1433.9 $\pm$ 589.3                 | 0.8341 <sup>+</sup>               |
| FEV 1 / FVC %                                     | 52.7 $\pm$ 15.2    | 56.6 $\pm$ 12.1                     | 51.4 $\pm$ 13.8                    | 0.383 <sup>+</sup>                |
| FEV 1 ( % pred)                                   | 46.9 $\pm$ 19.2    | 47.6 $\pm$ 19.4                     | 46.6 $\pm$ 18.3                    | 0.8879 <sup>+</sup>               |

\*\*Fisher's exact test,

<sup>+</sup>Mann-Whitney U test

Supplementary Table 2A.

Cox's proportional hazards model analysis of prognostic factors in early NSCLC (Stage I) patients treated with surgery

| Variables                  | Hazards ratio | 95% CI      | Unfavorable/Favorable | P-value |
|----------------------------|---------------|-------------|-----------------------|---------|
| <b>Univariate analysis</b> |               |             |                       |         |
| Serum Nectin-4             | 3.209         | 1.119-9.203 | positive / negative   | 0.0301* |
| Age ( years )              | 1.486         | 0.466-4.738 | >=65 / < 65           | 0.5033  |
| Gender                     | 1.360         | 0.472-3.922 | Male / Female         | 0.5688  |
| Histological type          | 1.144         | 0.256-5.118 | ADC / non-ADC         | 0.8602  |
| pT factor                  | 1.092         | 0.366-3.258 | T2 / T1               | 0.8751  |
| Smoking                    | 1.388         | 0.481-4.011 | smoker/non-smoker     | 0.3689  |

ADC, adenocarcinoma, \*P &lt; 0.05

Supplementary Table 2B.

Cox's proportional hazards model analysis of prognostic factors in advanced NSCLC (Stage IIIB-IV) patients treated with chemotherapy

| Variables                    | Hazards ratio | 95% CI       | Unfavorable/Favorable    | P-value |
|------------------------------|---------------|--------------|--------------------------|---------|
| <b>Univariate analysis</b>   |               |              |                          |         |
| Serum Nectin-4               | 3.145         | 1.078-9.176  | positive / negative      | 0.0360* |
| Age ( years )                | 1.167         | 0.527-2.585  | >=65 / < 65              | 0.7026  |
| Gender                       | 1.090         | 0.454-2.613  | Male / Female            | 0.8475  |
| Histological type            | 2.026         | 0.794-5.170  | non-ADC / ADC            | 0.1395  |
| Performance status           | 15.852        | 3.467-72.488 | PS 2/ PS 0-1             | 0.0004* |
| Stage                        | 2.836         | 0.848-9.488  | IV / IIIB                | 0.0906  |
| Smoking                      | 1.147         | 0.493-2.669  | smoker/non-smoker        | 0.7497  |
| <b>Multivariate analysis</b> |               |              |                          |         |
| Nectin-4                     | 3.139         | 1.074-9.173  | Serum Nectin-4 (+) / (-) | 0.0394* |
| Performance status           | 15.765        | 1.074-72.173 | PS 2/ PS 0-1             | 0.0004* |

ADC, adenocarcinoma, \*P &lt; 0.05
