# Supplementary figures and images for: Identification of Nectin-4 Oncoprotein as a Diagnostic and Therapeutic Target for Lung Cancer
Source: Oxford University Press journal article supplement (doi:10.1158/0008-5472.can-09-0016), 2009-08-12

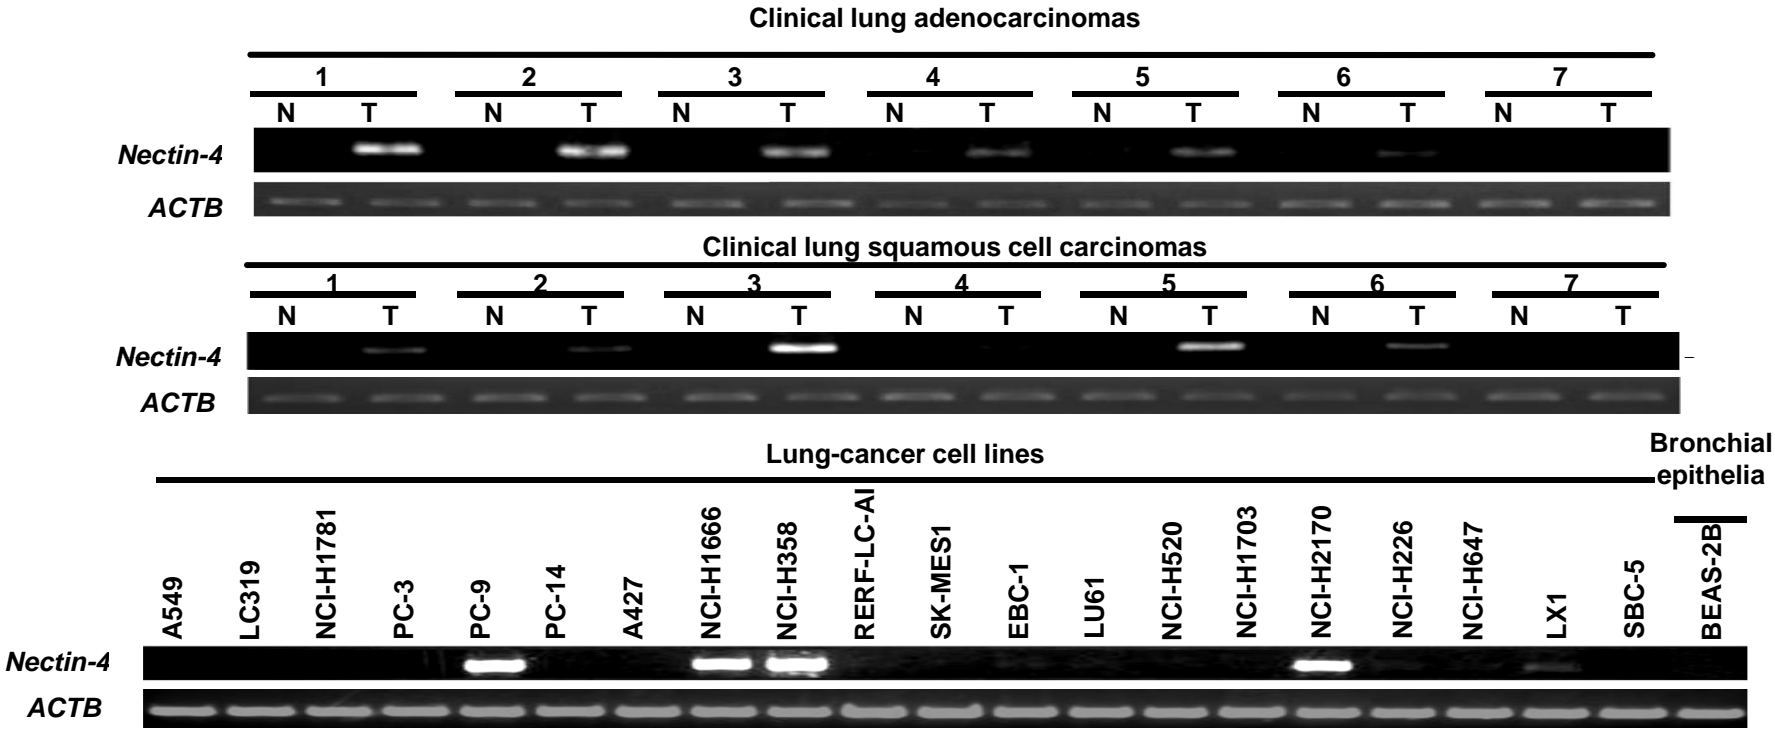

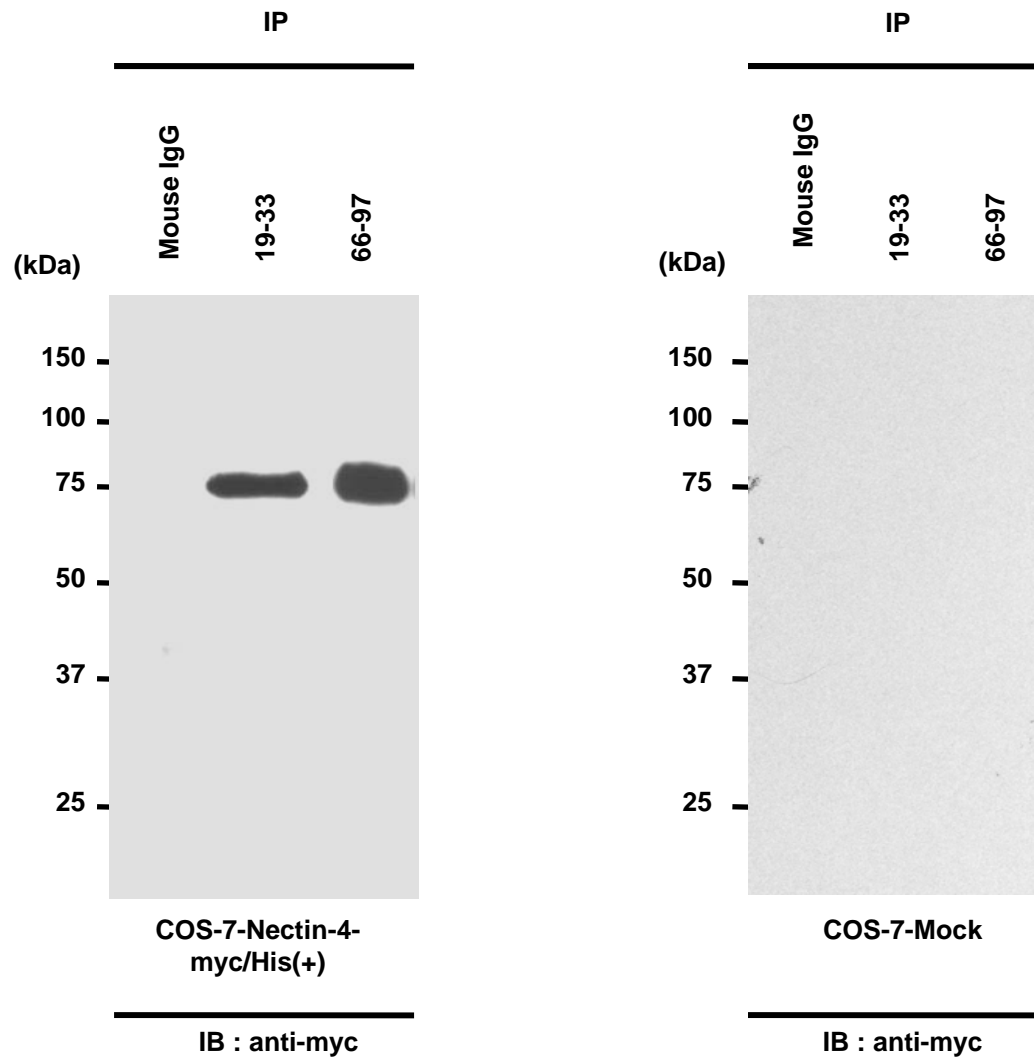

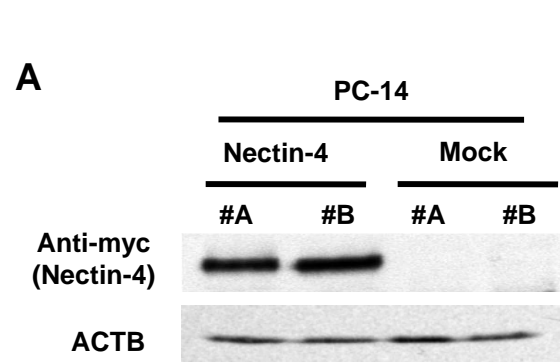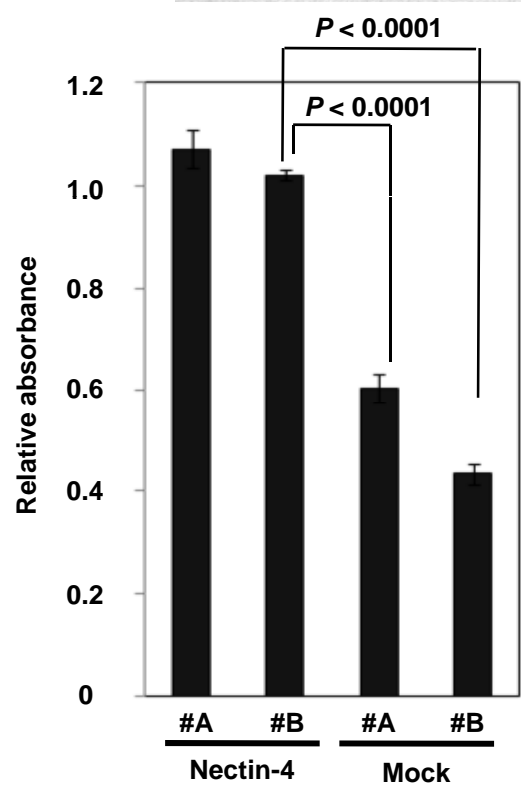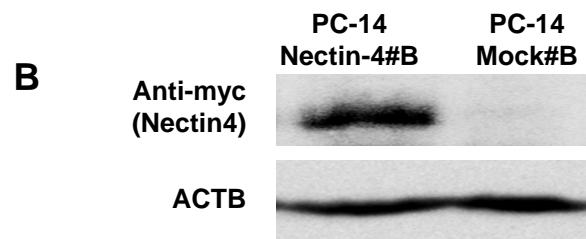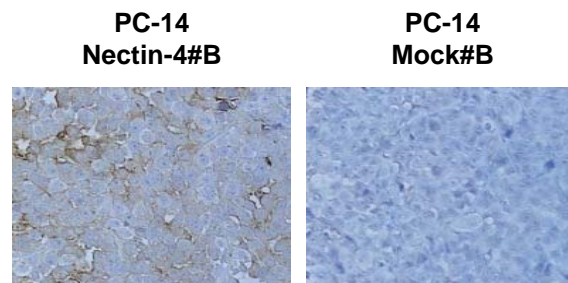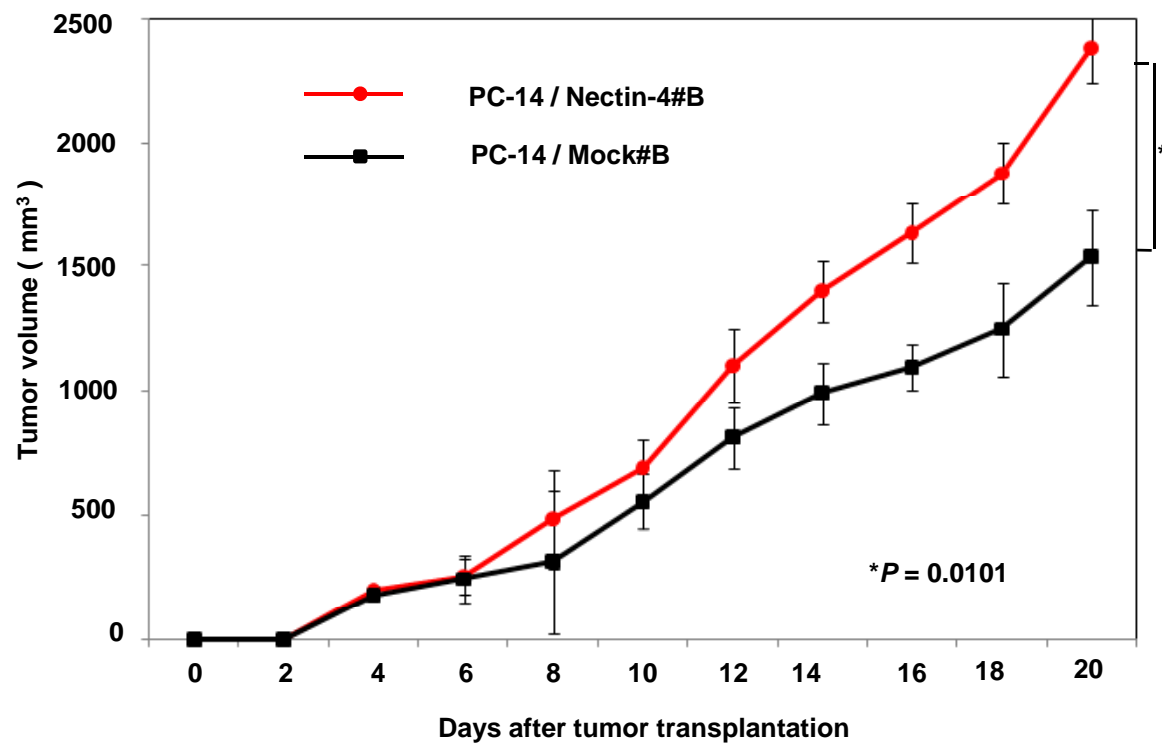

# Supplementary Figure 4

## A Colony-Formation Assay

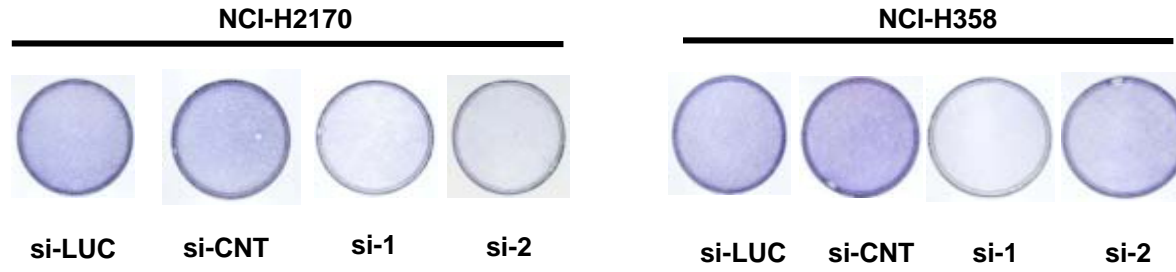

## B

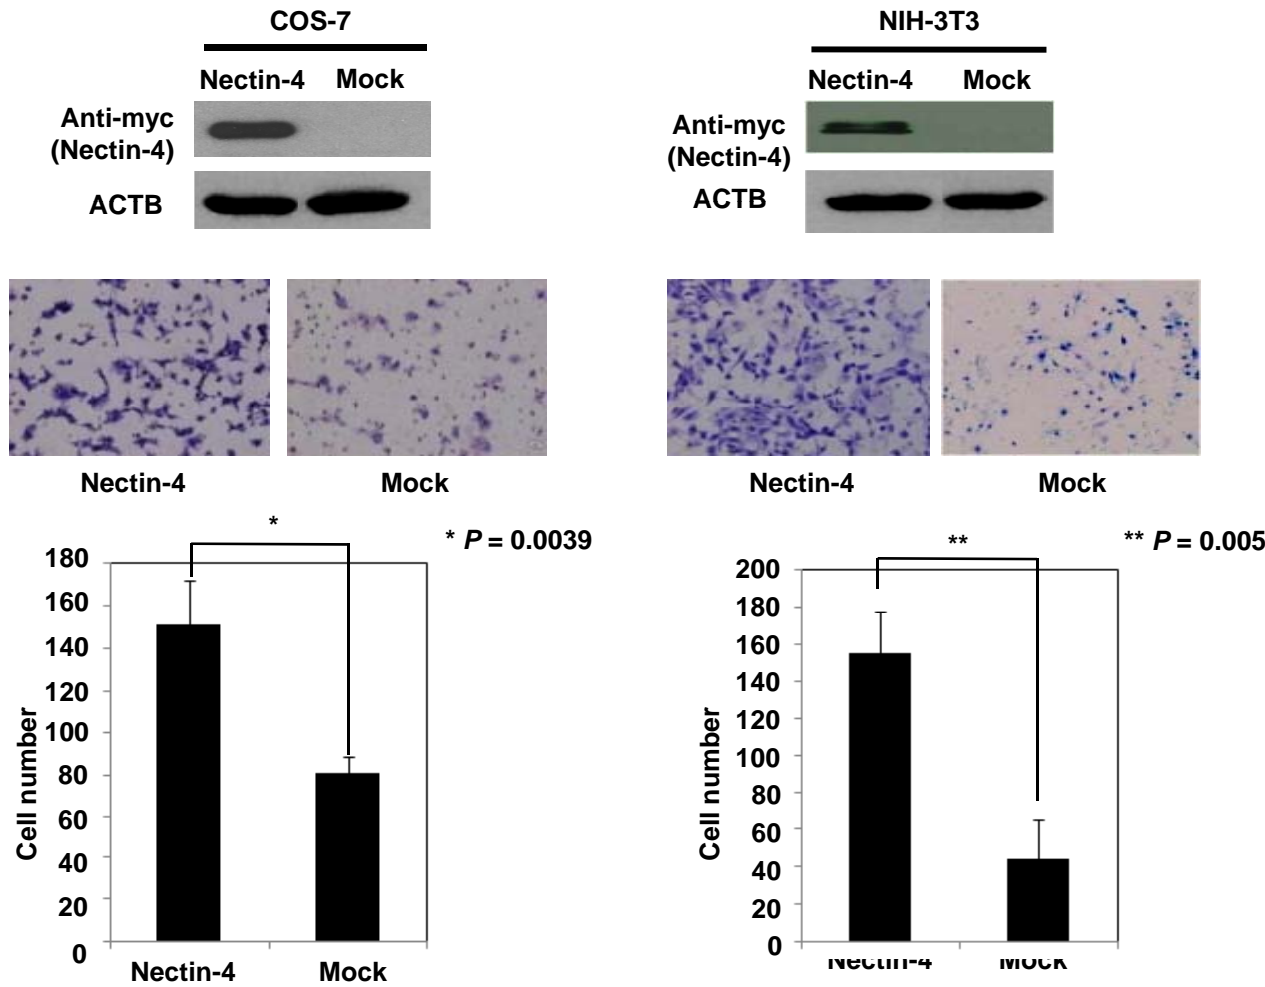

Supplement: 00085472can090016-sup-sfigs_1-4.pdf [file 00085472can090016-sup-sfigs_1-4.pdf]
